# Supplementary material
Source: publisher figshare collection journal article supplement (https://acs.figshare.com/ndownloader/files/9413728)
Supplement: Supplementary file 1 [file 9413728]

# pH Tunable and Divalent Metal Ion Tolerant Polymer Lipid Nanodiscs

*Thirupathi Ravula,<sup>†</sup> Nathaniel Z. Hardin,<sup>†</sup> Sudheer Kumar Ramadugu and Ayyalusamy Ramamoorthy\**

Biophysics Program and Department of Chemistry, The University of Michigan, Ann Arbor, MI 48109-1055, USA.

## Electronic supplementary information

### Fourier-Transform Infrared (FT-IR) Spectroscopy:

The FT-IR spectra from 4000  $\text{cm}^{-1}$  to 800  $\text{cm}^{-1}$  were recorded using a Thermos scientific ATR-FTIR instrument. Water was removed by lyophilization from each of the samples before recording the spectrum.

**<sup>31</sup>P CSA:** As shown in the main text, the parallel edge at 25.5 ppm and the perpendicular edge at -26.43 ppm to result in a CSA span for the <sup>31</sup>P powder patten to be ~50 ppm (Figure 3E in the main text, pH 6.0). On the other hand, the sample prepared at pH=8.5 exhibited the parallel edge at 27.2 ppm and the perpendicular edge at -21.4 ppm to result in a similar CSA span for the <sup>31</sup>P powder patten to be ~50 ppm (Figure 3F in the main text, pH=8.5).

**Dynamic Light Scattering (DLS):** All DLS experiments were performed using Wyatt Technology® DynaPro® NanoStar® using a 1  $\mu$ L quartz MicroCuvette.

**Transmission Electron Microscopy (TEM):** All TEM micrographs were obtained using a Technai® T-20® machine (FEI®, Netherlands) with a 80 kV operating voltage. A dilute solution was dropped on the carbon-coated copper grid and dried overnight at room temperature in a desiccator before using in the experiments.

**Measuring the effect of divalent metal ions on SMA-EA nanodiscs:** Nanodiscs were titrated using 3.3 M  $\text{CaCl}_2$  or 5 M  $\text{MgCl}_2$  in 10 mM citric acid buffer or 10 mM HEPES in low or high pH condition, respectively.

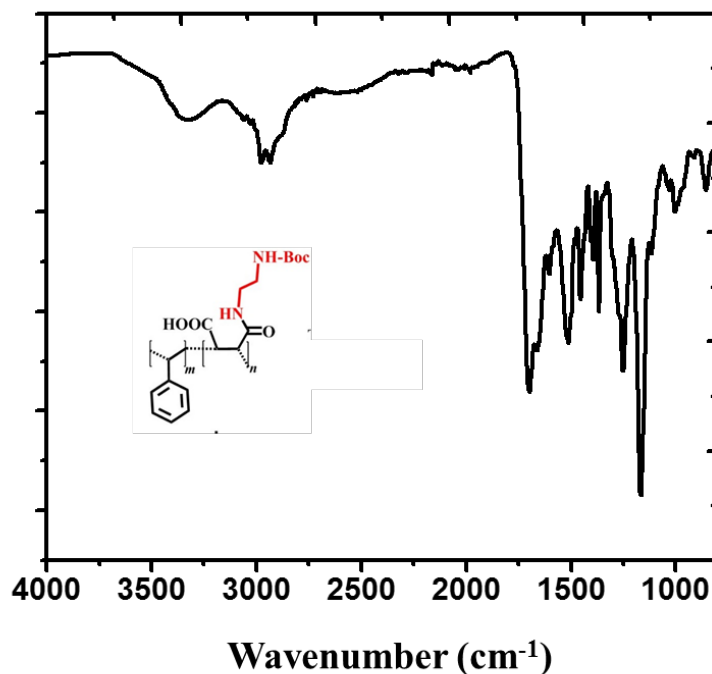

**Figure S1:** FTIR spectrum of N-Boc-SMA-ED.

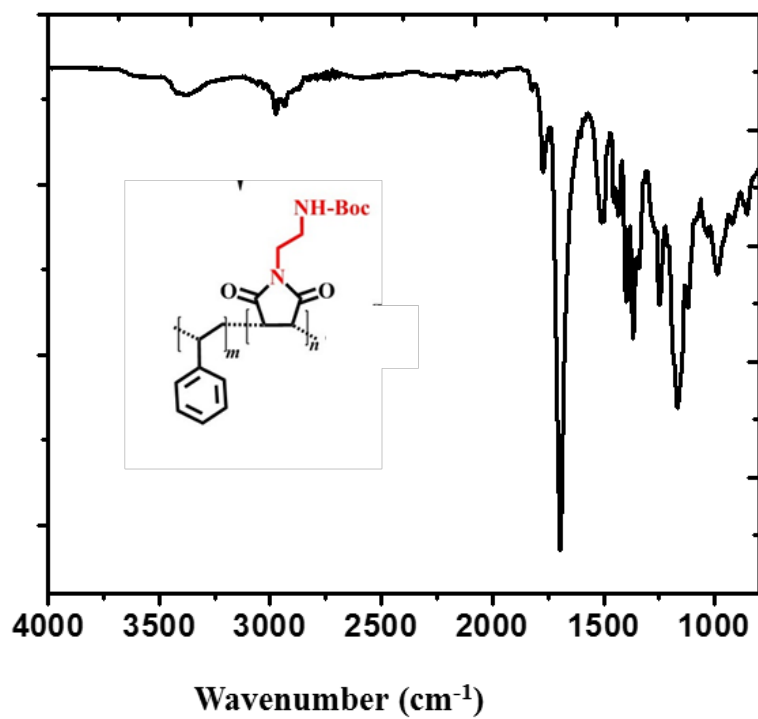

**Figure S2:** FTIR spectrum of N-Boc-SMAd-A.

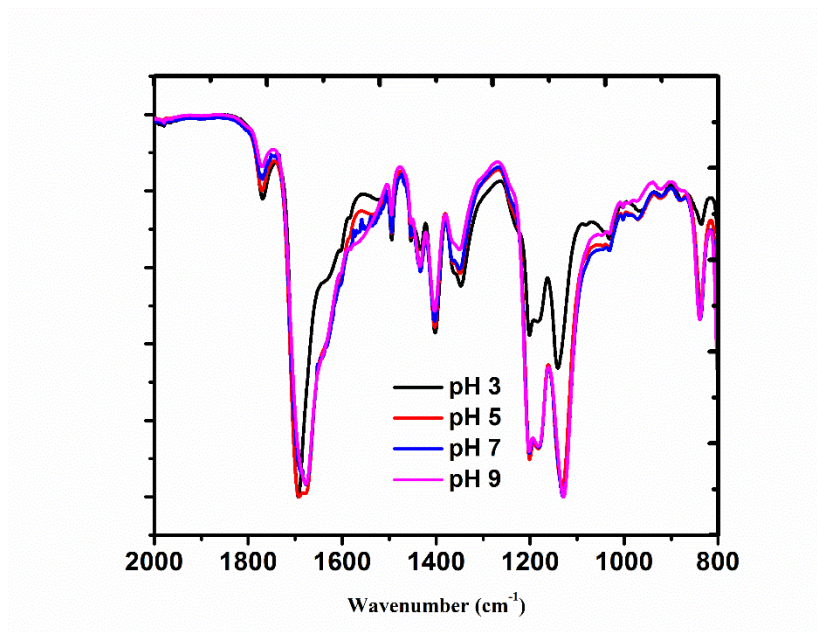

**Figure S3:** FT-IR spectra of SMAd-A at different pH showing the absence of carboxylate peak under basic pH. This observation confirms the successful formation of the maleimide group.

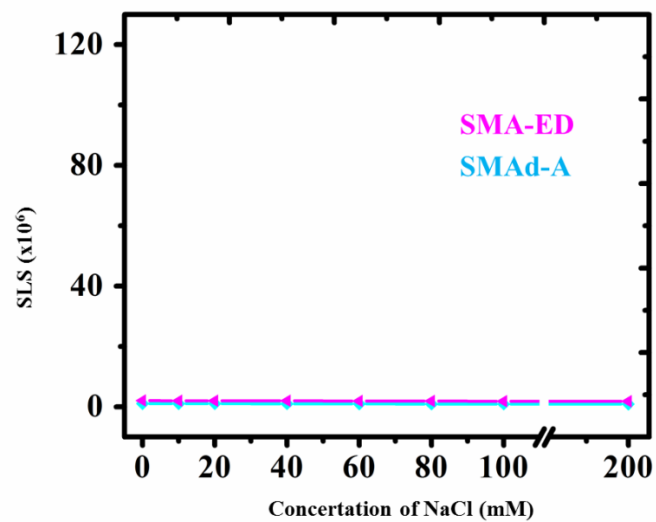

**Figure S4:** SLS profiles of nanodiscs made up of SMA-ED or SMAd-A showing stability in the presence of indicated NaCl concentration.
